# Supplementary material
Source: Springer Nature journal article supplement (https://www.springermedizin.de/resource/supplementary/12936_2013_2867_MOESM7_ESM.pdf/9544484)

Estimated % access to ITN  
using administrative data and factor 1.8

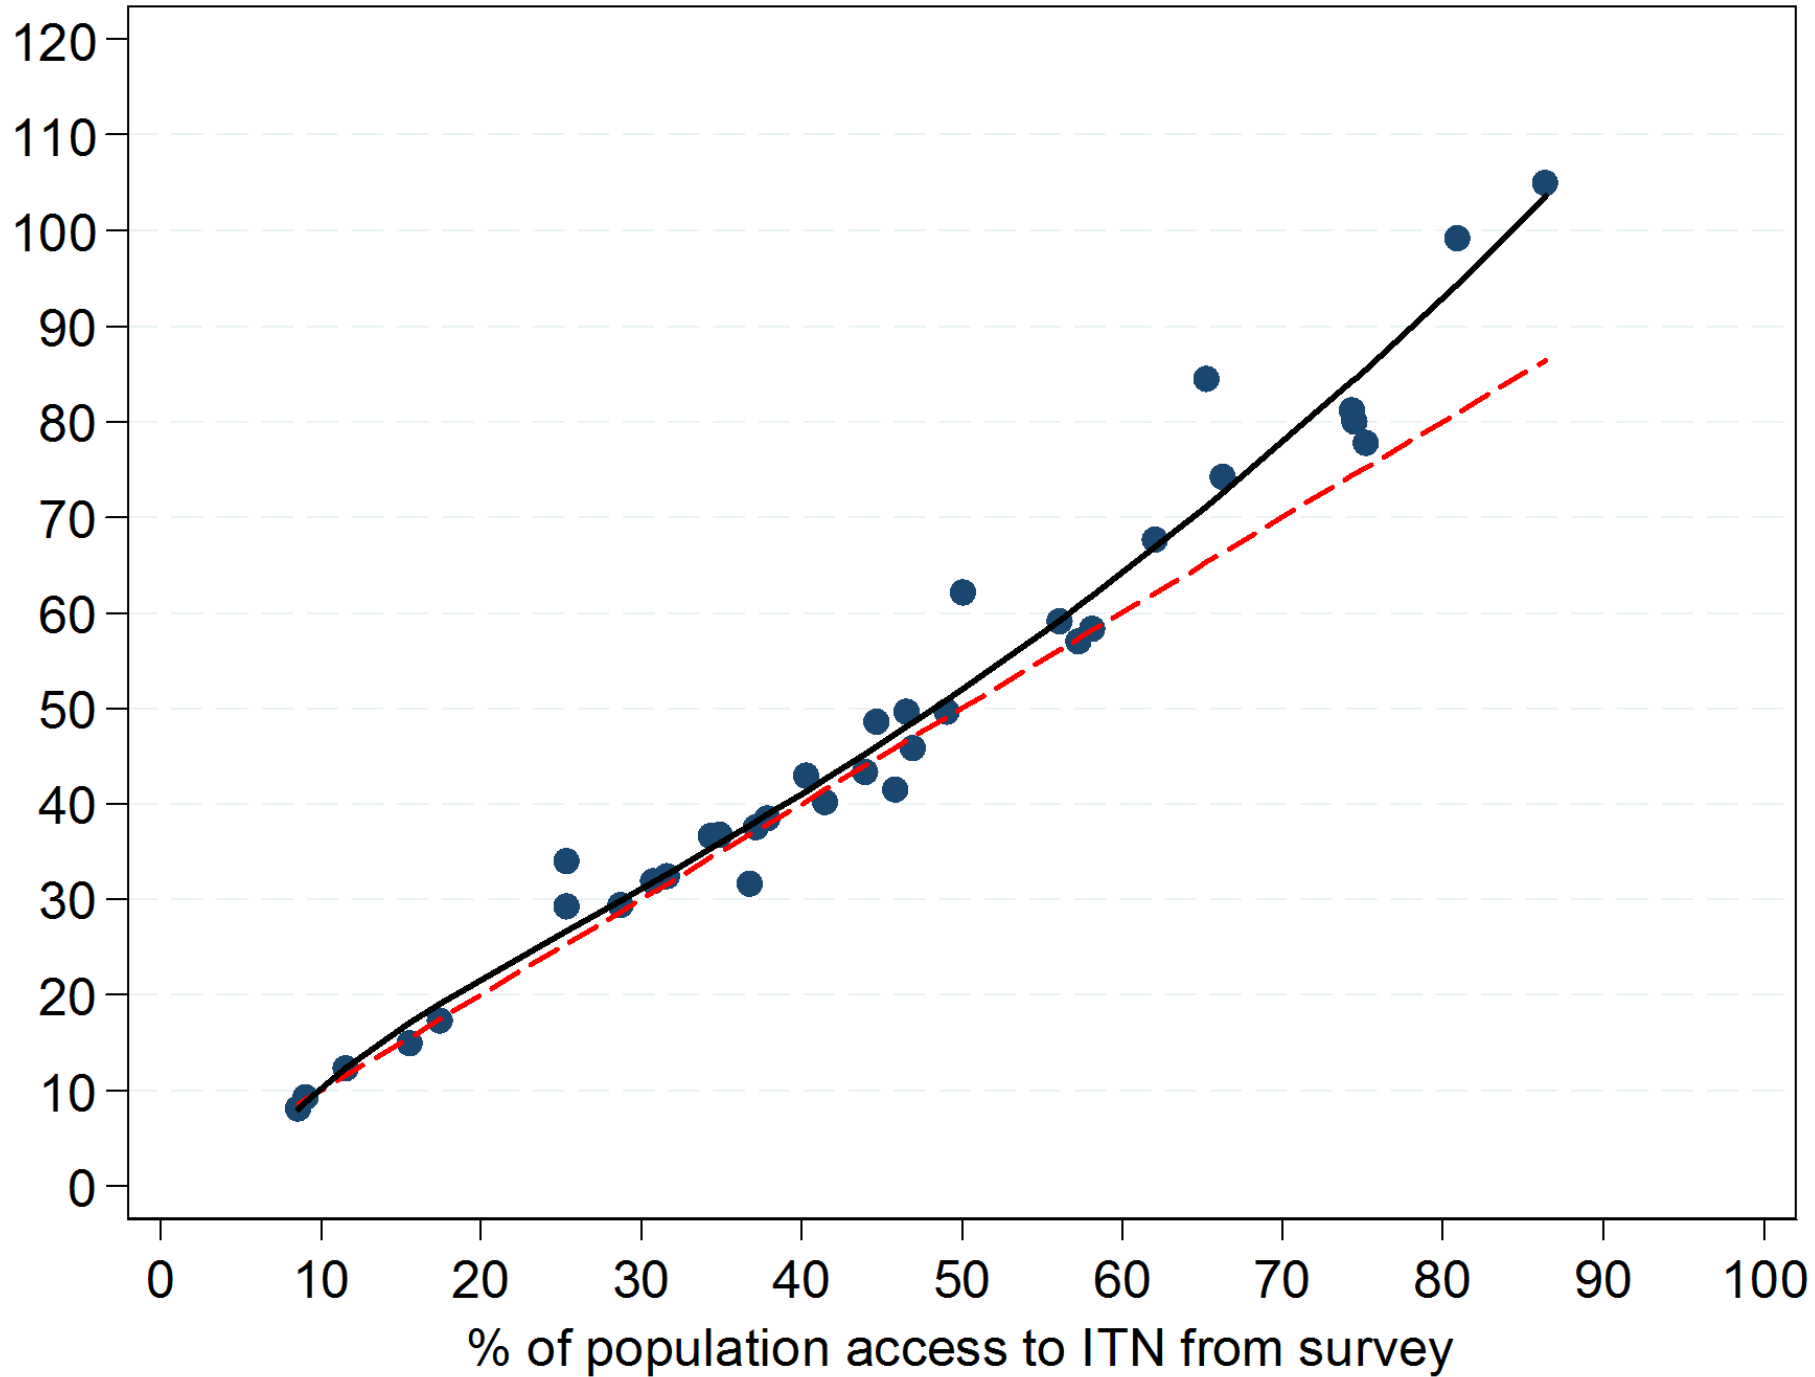

Supplement: MOESM7 [file 9544484]
